# Supplementary material
Source: PubMed Central journal article supplement (PMC7254798)
Supplement: ao0c01078_si_001.pdf [file ao0c01078_si_001.pdf]

## Supporting Information

### Insight into the loading and release properties of MCM-48/biopolymer composites as carriers for 5-fluorouracil; equilibrium modeling and pharmacokinetic studies

Mostafa R. Abukhadra <sup>\*†,‡</sup>, Nermen M. Refay <sup>‡,§</sup>, Ahmed M. El-Sherbeeny <sup>\*\*ξ</sup>, Mohammed A. El-Meligy <sup>\*</sup>

<sup>†</sup>Geology Department, Faculty of Science, Beni-Suef University, Beni –Suef city, Egypt

<sup>‡</sup>Materials Technologies and their Applications Lab, Geology Department, Faculty of Science, Beni-Suef University, Beni-Suef City, Egypt.

<sup>§</sup>Chemistry Department, Faculty of Science, Beni-Suef University, Beni –Suef city, Egypt.

<sup>ξ</sup> Industrial Engineering Department, College of Engineering, King Saud University, P.O. Box 800, Riyadh 11421, Saudi Arabia

<sup>\*</sup>Advanced Manufacturing Institute, King Saud University, Riyadh-11421, Saudi Arabia,

### Content

1. Table.S1. the representative equations of the studied kinetic and isotherm model and their parameters.....S2
2. Table S2. The determined values of the determination coefficient which were obtained for linear regression fitting of the releasing results with the pharmacokinetic models .....S3

# 1. Representative equation of kinetic and equilibrium models

**Table S1.** the representative equations of the studied kinetic and isotherm model and their parameters

| Kinetic models       |                                                                                                            |                                                                                                                                                                         |
|----------------------|------------------------------------------------------------------------------------------------------------|-------------------------------------------------------------------------------------------------------------------------------------------------------------------------|
| Model                | Linear equation                                                                                            | Parameters                                                                                                                                                              |
| Pseudo-first-order   | $\ln (q_e - q_t) = \ln q_e - k_1 t$                                                                        | $q_t$ (mg/g) is the adsorbed drug at time (t), and $K_1$ is the rate constant of the first-order adsorption ( $\text{min}^{-1}$ )                                       |
| Pseudo-second-order  | $\frac{t}{q_t} = \frac{1}{K_2 q_e^2} + \frac{t}{q_e}$                                                      | $q_e$ is the quantity of adsorbed drug after equilibration (mg/g), and $K_2$ is Lagergren model rate constant (g/mg min).                                               |
| Isotherm models      |                                                                                                            |                                                                                                                                                                         |
| Model                | Equation                                                                                                   | Parameters                                                                                                                                                              |
| Langmuir             | $\frac{C_e}{q_e} = \frac{1}{b q_{\max}} + \frac{C_e}{q_{\max}}$ (Linear)                                   | $C_e$ is the rest drug concentrations (mg/L), $q_{\max}$ is the theoretical maximum ibuprofen drug capacity (mg/g), and $b$ is the Langmuir constant (L/mg)             |
|                      | $q_e = \frac{q_{\max} b C_e}{(1 + b C_e)}$ (Nonlinear)                                                     |                                                                                                                                                                         |
| Freundlich           | $\text{Log } q_e = (1/n) \text{log } C_e + \text{log } K_f$ (Linear)<br>$q_e = K_f C_e^{1/n}$ (Nonlinear)  | $K_f$ is the constant of Freundlich model related to the adsorption capacity and $n$ is the constant of Freundlich model related to the adsorption intensities          |
| Dubinin–Radushkevich | $\ln (q_e) = \ln (q_m) - \beta \varepsilon^2$ (Linear)<br>$q_e = q_m e^{-\beta \varepsilon^2}$ (Nonlinear) | $\beta$ ( $\text{mol}^2/\text{KJ}^2$ ) is the D-R constant, $\varepsilon$ ( $\text{KJ}^2/\text{mol}^2$ ) is the polanyi potential, and $q_m$ is the adsorption capacity |

## 2. Determination coefficient values of the pharmacokinetic models

**Table S2.** The determined values of the determination coefficient which were obtained for linear regression fitting of the releasing results with the pharmacokinetic models

| Models                 | Materials | Determination coefficient (R <sup>2</sup> ) |        |
|------------------------|-----------|---------------------------------------------|--------|
|                        |           | pH 1.2                                      | pH 7.4 |
| Zero-order model       | MCM-48    | 0.5                                         | 0.62   |
|                        | MCM/ST    | 0.68                                        | 0.61   |
|                        | MCM/CH    | 0.75                                        | 0.67   |
|                        | MCM/CD    | 0.73                                        | 0.66   |
| First order model      | MCM-48    | 0.54                                        | 0.75   |
|                        | MCM/ST    | 0.90                                        | 0.86   |
|                        | MCM/CH    | 0.91                                        | 0.88   |
|                        | MCM/CD    | 0.93                                        | 0.92   |
| Higuchi model          | MCM-48    | 0.71                                        | 0.82   |
|                        | MCM/ST    | 0.87                                        | 0.82   |
|                        | MCM/CH    | 0.92                                        | 0.86   |
|                        | MCM/CD    | 0.90                                        | 0.85   |
| Hixson-Crowell model   | MCM-48    | 0.52                                        | 0.71   |
|                        | MCM/ST    | 0.84                                        | 0.80   |
|                        | MCM/CH    | 0.87                                        | 0.83   |
|                        | MCM/CD    | 0.88                                        | 0.85   |
| Korsmeyer-peppas model | MCM-48    | 0.82                                        | 0.85   |
|                        | MCM/ST    | 0.93                                        | 0.90   |
|                        | MCM/CH    | 0.94                                        | 0.91   |
|                        | MCM/CD    | 0.93                                        | 0.92   |
